# Supplementary material for: B cell c-Maf signaling promotes tumor progression in animal models of pancreatic cancer and melanoma
Source: PubMed Central journal article supplement — J Immunother Cancer. 2024 Nov 27;12(11):e009861. doi: 10.1136/jitc-2024-009861 (PMC11603694; doi:10.1136/jitc-2024-009861), 2024-11-27
Supplement: jitc-12-11-s001.pdf [file jitc-12-11-s001.pdf]

## **Supplemental Data**

### **B cell c-Maf signaling promotes tumor progression in tumor models of pancreatic cancer and melanoma**

Qian Zhong, Hongying Hao, Shu Li, Yongling Ning, Hong Li, Xiaoling Hu, Kelly M.

McMasters, Jun Yan, Chuanlin Ding

**Supplemental Table 1.** Antibodies used in Flow cytometry and Western blot

| <b>Antibodies</b>                                     | <b>Company and catalog number</b>            |
|-------------------------------------------------------|----------------------------------------------|
| PerCP/Cyanine5.5 anti-mouse CD45 (clone S18009F)      | BioLegend Cat # 157208                       |
| PE/Cyanine7 anti-mouse CD45 (clone S18009F)           | BioLegend Cat # 157206                       |
| PerCP/Cyanine5.5 anti-mouse IgM (clone RMM-1)         | BioLegend Cat # 406512                       |
| FITC anti-mouse CD21/CD35 (clone 7E9)                 | BioLegend Cat # 123408                       |
| APC anti-mouse CD19 (clone 6D5)                       | BioLegend Cat # 115512                       |
| PE anti-mouse IgM (clone RMM-1)                       | BioLegend Cat # 406508                       |
| PerCP/Cyanine5.5 anti-mouse IgD (clone 11-26c.2a)     | BioLegend Cat # 405709                       |
| PE/Cyanine7 anti-mouse CD5 (clone 53-7.3)             | BioLegend Cat # 100621                       |
| FITC Anti-Mouse CD43 (clone S7)                       | BD Bioscience Cat # 553270                   |
| APC anti-mouse CD4 (clone GK1.5)                      | BioLegend Cat # 100412                       |
| FITC anti-mouse CD8a (clone 53-6.7)                   | BioLegend Cat # 100706                       |
| APC anti-mouse CD19 (clone 6D5)                       | BioLegend Cat # 115512                       |
| PE anti-mouse IL-10 (clone JES5-16E3)                 | BioLegend Cat # 505007                       |
| PE anti-mouse IFN- $\gamma$ (clone XMG1.2)            | BioLegend Cat # 505808                       |
| PE anti-mouse IgG1 (clone RMG1-1)                     | BioLegend Cat # 406608                       |
| PE anti-mouse IgG2a (clone RMG2a-62)                  | BioLegend Cat # 407108                       |
| PE anti-mouse IgG2b (clone RMG2b-1)                   | BioLegend Cat # 406708                       |
| PE anti-human CD19 (clone HIB19)                      | BioLegend Cat # 302208                       |
| PerCP/Cyanine5.5 anti-human IgD (clone IA6-2)         | BioLegend Cat # 348208                       |
| PE/Cyanine7 anti-mouse/rat/human CD27 (clone LG.3A10) | BioLegend Cat # 124215                       |
| APC anti-human IL-10 (clone JES3-19F1)                | BioLegend Cat # 506807                       |
| Alexa Fluor 700 anti-human CD11c (clone Bu15)         | BioLegend Cat # 337220                       |
| PerCP-eFluor™ 710 c-MAF monoclonal antibody (sym0F1)  | Invitrogen Cat # 46-9855-42                  |
| PE c-MAF monoclonal antibody (sym0F1)                 | Invitrogen Cat # 12-9855-42                  |
| c-Maf Antibody (M-153) for Western blotting           | Santa Cruz Cat # sc-7866                     |
| Fixable Viability Dye eFluor™ 780                     | Thermo Fisher Scientific<br>Cat # 65-0865-14 |

**Supplemental Table 2.** Anti-mouse antibodies for CyTOF

|    | <b>Tag</b> | <b>Target</b> | <b>Clone</b> | <b>Company and catalog number</b> |
|----|------------|---------------|--------------|-----------------------------------|
| 1  | 89Y        | CD45          | 30-F11       | Fluidigm Cat # 3089005B           |
| 2  | 141Pr      | TNF- $\alpha$ | MP6-XT22     | Fluidigm Cat # 3141013B           |
| 3  | 142Nd      | CD11c         | N418         | Fluidigm Cat # 3142003B           |
| 4  | 143Nd      | CD69          | H1.2F3       | Fluidigm Cat # 3143004B           |
| 5  | 144Nd      | IL-2          | JES6-5H4     | Fluidigm Cat # 3144002B           |
| 6  | 145Nd      | CD4           | RM4-5        | Fluidigm Cat # 3145002B           |
| 7  | 146Nd      | F4/80         | BM8          | Fluidigm Cat # 3146008B           |
| 8  | 148Nd      | CD103         | 2E7          | BioLegend Cat # 121402            |
| 9  | 149Sm      | CD19          | 6D5          | Fluidigm Cat # 3149002B           |
| 10 | 150Nd      | Ly-6C         | NK1.4        | Fluidigm Cat # 3150010B           |
| 11 | 151Eu      | CD25          | 3C7          | Fluidigm Cat # 3151007B           |
| 12 | 152Sm      | CD3e          | 145-2C11     | Fluidigm Cat # 3152004B           |
| 13 | 153Eu      | CD274/PD-L1   | MIH5         | Fluidigm Cat # 3153031B           |
| 14 | 155Gd      | IL-10         | JES5-16E3    | BioLegend Cat # 505029            |
| 15 | 156Gd      | CCR2          | 475301R      | R&D System Cat # MAB55381R        |
| 16 | 158Gd      | Foxp3         | FJK-16s      | Fluidigm Cat # 3158003A           |
| 17 | 159Tb      | PD-1          | 29F.1A12     | Fluidigm Cat # 3159024B           |
| 18 | 160Gd      | CD62L         | MEL-14       | Fluidigm Cat # 3160008B           |
| 19 | 161Dy      | iNOS          | CXNFT        | Fluidigm Cat # 3161011B           |
| 20 | 162Dy      | CD44          | IM7          | Fluidigm Cat # 3162030B           |
| 21 | 164Dy      | CX3CR1        | SA011F11     | Fluidigm Cat # 3164023B           |
| 22 | 165Ho      | IFN- $\gamma$ | XMG1.2       | Fluidigm Cat # 3165003B           |
| 23 | 167Er      | IL-6          | MP5-20F3     | Fluidigm Cat # 3167003B           |
| 24 | 168Er      | CD8a          | 53-6.7       | Fluidigm Cat # 3168003B           |
| 25 | 169Tm      | CD206         | C068C2       | Fluidigm Cat # 3169021B           |
| 26 | 170Er      | NK1.1         | PK136        | Fluidigm Cat # 3170002B           |
| 27 | 172Yb      | CD11b         | M1/70        | Fluidigm Cat # 3172012B           |
| 28 | 174Yb      | CD223/LAG3    | C9B7W        | Fluidigm Cat # 3174019B           |
| 29 | 175Yb      | CD127/IL7Ra   | A7R34        | Fluidigm Cat # 3175006B           |
| 30 | 176Yb      | CD45R/B220    | RA3-6B2      | Fluidigm Cat # 3176002B           |
| 31 | 209Bi      | I-A/I-E       | M5/114.15.2  | Fluidigm Cat # 3209006B           |

**Supplemental Table 3.** Anti-human antibodies for CyTOF

|    | <b>Tag</b> | <b>Target</b> | <b>Clone</b> | <b>Company and catalog number</b> |
|----|------------|---------------|--------------|-----------------------------------|
| 1  | 89Y        | CD45          | HI30         | Fluidigm Cat # 3089003B           |
| 2  | 114Cd      | CD20          | 2H7          | BioLegend Cat # 302343            |
| 3  | 116Cd      | CD19          | HIB19        | BioLegend Cat # 302247            |
| 4  | 141Pr      | CD196/CCR6    | G034E4(11A9) | Fluidigm Cat # 3141003A           |
| 5  | 142Nd      | CD40          | 5C3          | Fluidigm Cat # 3142010B           |
| 6  | 143Nd      | CD123         | 6H6          | Fluidigm Cat # 3143014B           |
| 7  | 144Nd      | CD69          | FN50         | Fluidigm Cat # 3144018B           |
| 8  | 146Nd      | IgD           | IA6-2        | Fluidigm Cat # 3146005B           |
| 9  | 147Sm      | CD11c         | Bu15         | Fluidigm Cat # 3147008B           |
| 10 | 149Sm      | CD45RO        | UCHL1        | Fluidigm Cat # 3149001B           |
| 11 | 152Sm      | CD21          | BL13         | Fluidigm Cat # 3152010B           |
| 12 | 154Sm      | TIM-3         | F38-2E2      | Fluidigm Cat # 3154010B           |
| 13 | 156Gd      | CD86          | IT2.2        | Fluidigm Cat # 3156008B           |
| 14 | 158Gd      | CD284         | HTA125       | Fluidigm Cat # 3158024B           |
| 15 | 159Tb      | CD197/CCR7    | G043H7       | Fluidigm Cat # 3159003A           |
| 16 | 161Dy      | CD80          | 2D10.4       | Fluidigm Cat # 3161023B           |
| 17 | 162Dy      | CD79b         | CB3-1        | Fluidigm Cat # 3162008B           |
| 18 | 163Dy      | CXCR3         | G025H7       | Fluidigm Cat # 3163004B           |
| 19 | 164Dy      | CXCR5         | RF8B2        | Fluidigm Cat # 3164029B           |
| 20 | 165Ho      | CD45RA        | HI100        | BioLegend Cat # 304143            |
| 21 | 167Er      | CD27          | L128         | Fluidigm Cat # 3167006B           |
| 22 | 169Tm      | CD25          | 2A3          | Fluidigm Cat # 3169003B           |
| 23 | 172Yb      | CD38          | HIT2         | Fluidigm Cat # 3172007B           |
| 24 | 173Yb      | HLA-Dr        | L243         | Fluidigm Cat # 3173005B           |
| 25 | 174Yb      | CD279/PD1     | EH12.2H7     | Fluidigm Cat # 3174020B           |
| 26 | 175Lu      | CD274/PD-L1   | 29E.2A3      | Fluidigm Cat # 3175017B           |
| 27 | 176Yb      | c-Maf         | Polyclone    | Thermo Fisher Cat # PA5-23179     |

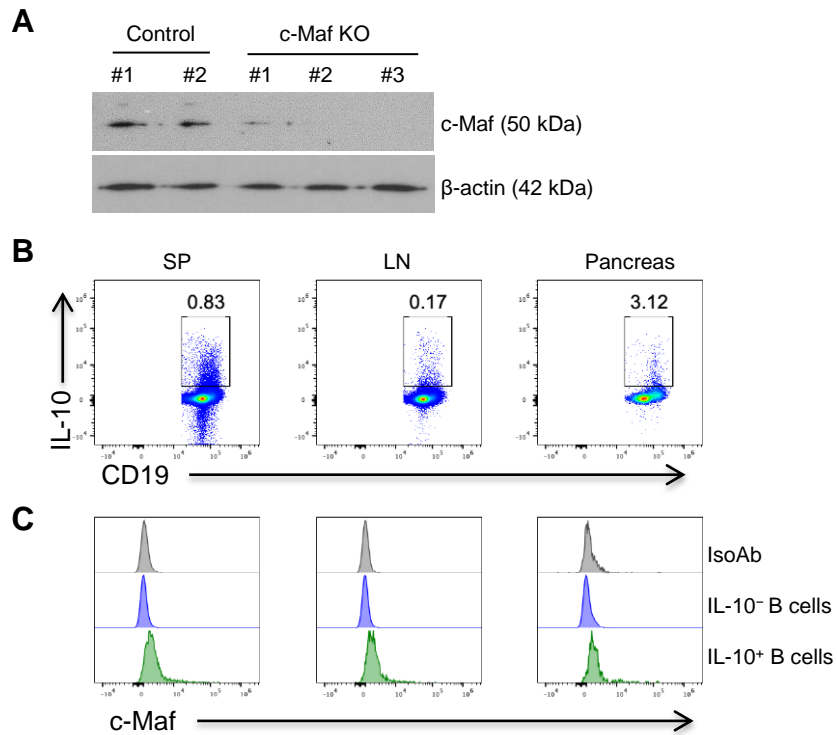

**Supplemental Figure 1.** (A) CD9<sup>+</sup>CD19<sup>+</sup> B cells were sorted from spleen of control (n=2) and conditional B cell c-Maf KO mice (n=3). c-Maf expression was determined by using Western blotting. (B) Spleen, lymph node, and pancreas were collected from naïve IL-10<sup>GFP</sup> reporter mice, and IL-10 expression was determined by measuring GFP fluorescence. (C) c-Maf expression in naïve IL-10<sup>-</sup> and IL-10<sup>+</sup> B cells was determined by intracellular staining and Flow cytometry.

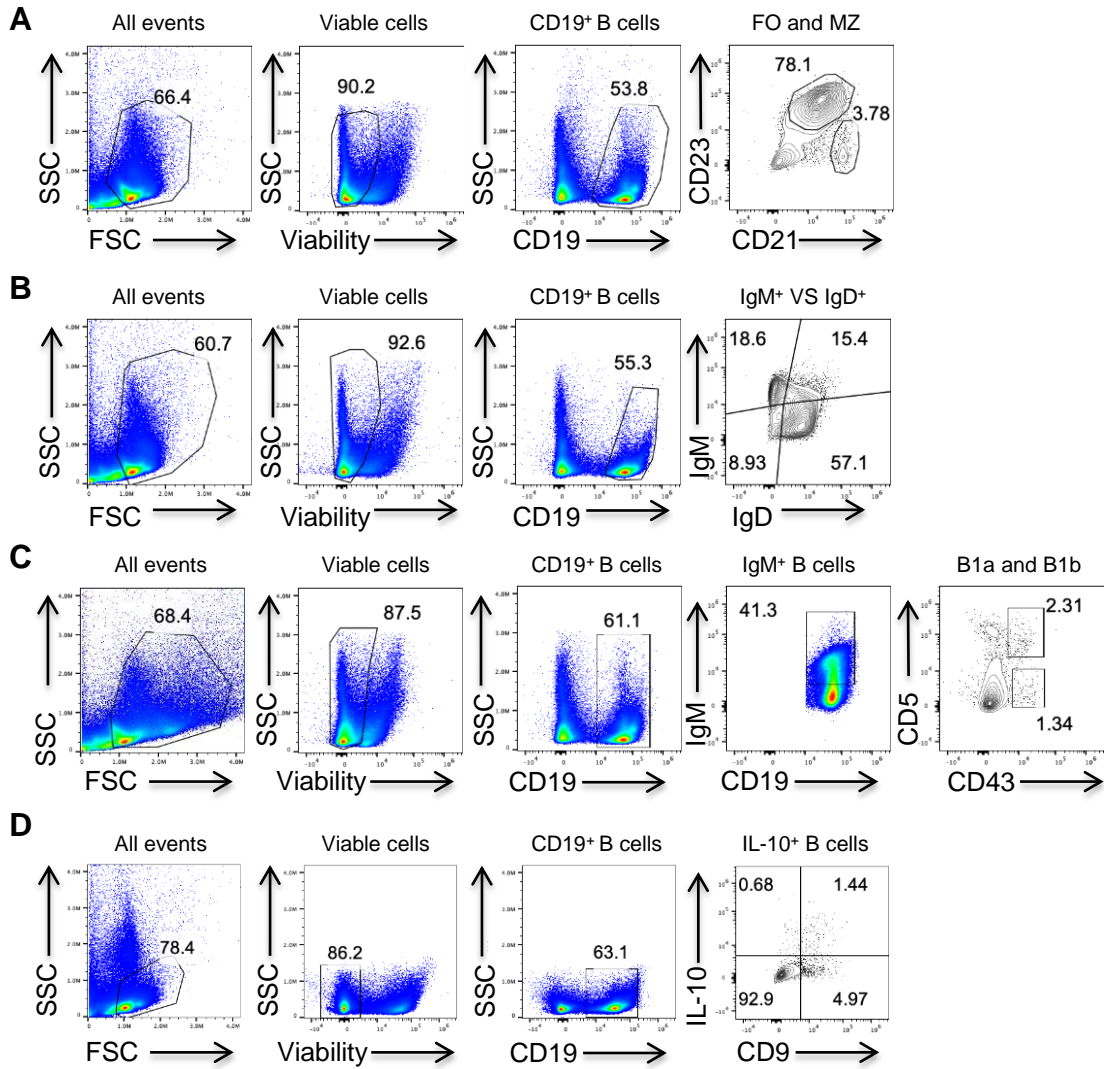

**Supplemental Figure 2.** Gating strategy used (A) for identification of follicular B cells (FO) and marginal zone (MZ) B cells; (B) for identification of IgM<sup>+</sup> and IgD<sup>+</sup> B cells; (C) for identification of B1a and B1b; (D) for identification of CD9<sup>+</sup>IL-10<sup>+</sup> B cells in figure 1.

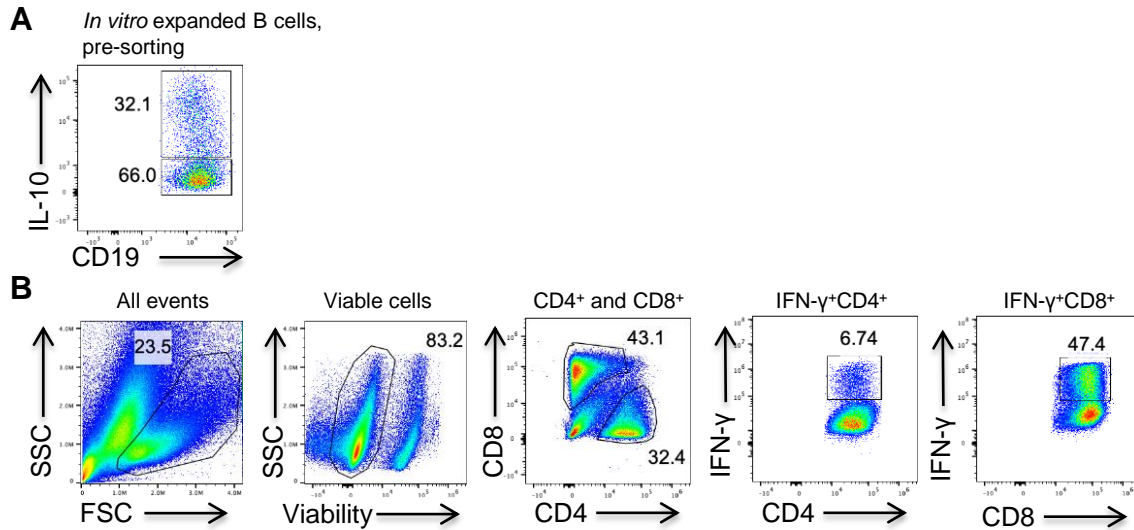

**Supplemental Figure 3.** Gating strategy used for IL-10<sup>+</sup> B cell sorting and coculture with CD4, CD8 T cells. (A) Splenocytes of IL-10<sup>9fp</sup> reporter mice were cultured with CD40L- and BAFF-expressing feeder cells (CD40LB) in the presence of IL-4 for 4 days followed by additional 3 days culture in the presence of IL-21. IL-10 positive versus negative was determined by measuring GFP fluorescence in the *in vitro* expanded B cells. (B) Gating strategy of co-culture of B cells and T cells. IL-10<sup>+</sup> and IL-10<sup>-</sup> B cells were sorted and cocultured with anti-CD3 mAb activated CD4<sup>+</sup> and CD8<sup>+</sup> T cells for 3 days. The IFN- $\gamma$  production by CD4<sup>+</sup> and CD8<sup>+</sup> T cells was evaluated by intracellular cytokine staining and Flow cytometry.

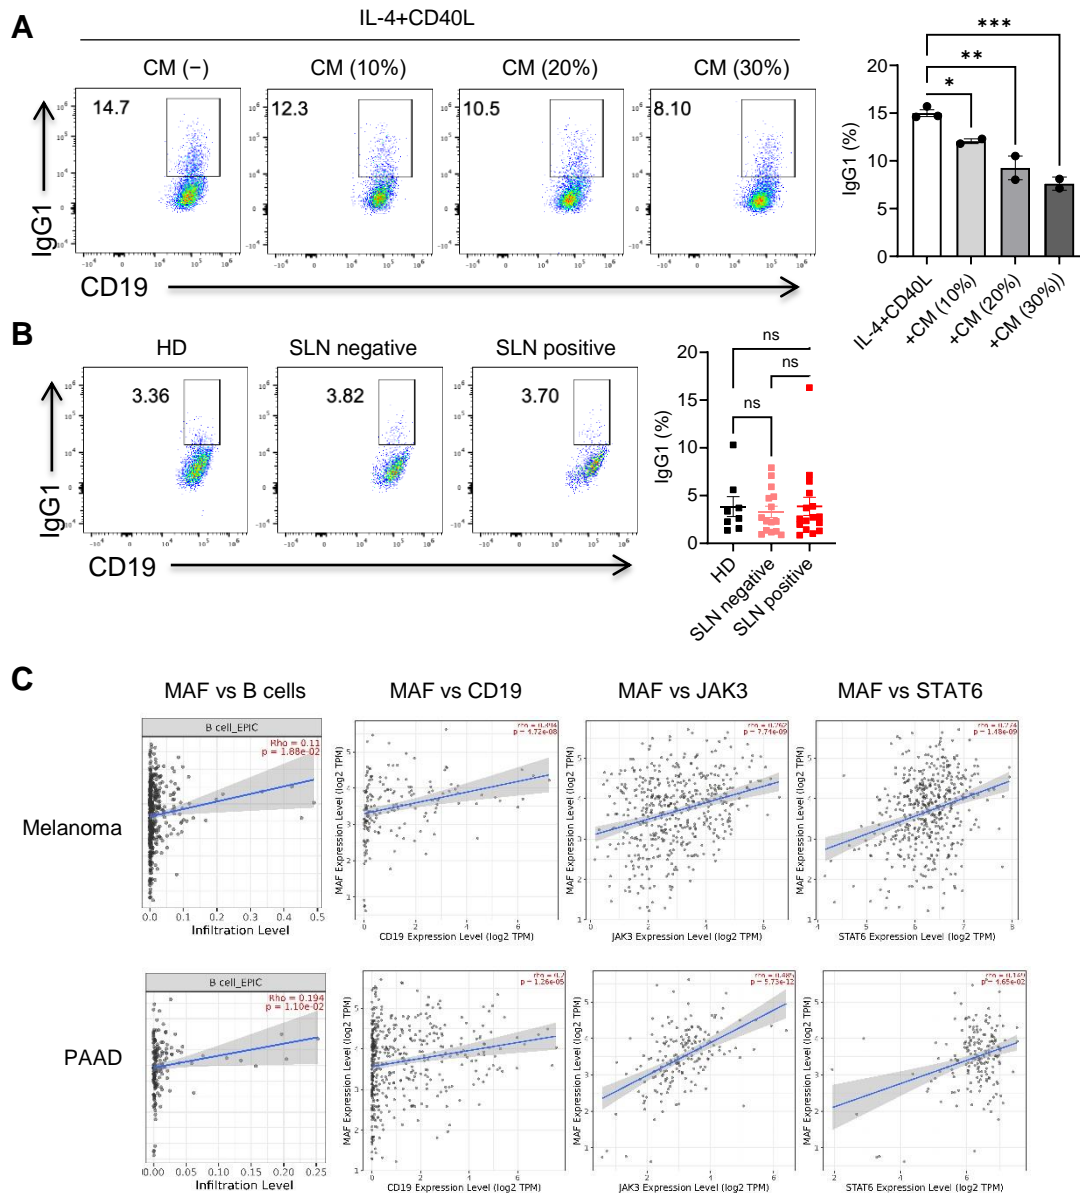

**Supplemental Figure 4.** (A) PBMCs from healthy donors were cultured in the presence of IL-4 and recombinant CD40L with or without A375 conditioned medium for 3 days. IgG1 positive B cells were determined by using Flow cytometry. (B) PBMCs from healthy donors, SLN negative and SLN positive melanoma patients were cultured in the presence of IL-4 and recombinant CD40L for 3 days. IgG1 positive B cells were determined by using Flow cytometry. Summarized data were shown. Each dot represents one person. \* $p < 0.05$ , \*\* $p < 0.01$ , \*\*\* $p < 0.001$  by Ordinary one-way ANOVA test. (C) The correlation of MAF and B cell infiltration as well as CD19, JAK3, STAT6 gene expression in melanoma and PAAD patients from The Cancer Genome Atlas (TCGA) using publicly available web platform TIMER2.0.
